# Supplementary material for: CBCT image quality QA: Establishing a quantitative program
Source: PubMed Central journal article supplement (PMC7701111; doi:10.1002/acm2.13062), 2020-10-19
Supplement: ACM2-21-215-s001.pdf [file ACM2-21-215-s001.pdf]

## Supplemental Material

**Table S1:** Detailed statistical results for two-way ANOVA test used to evaluate if image quality parameters are machine or technique dependent. For each main effect (machine, technique) and for the interaction term between the two factors the following are reported: test statistic ( $F$ ), degrees of freedom ( $df$ ), and p-value ( $p$ ).

| Parameter                     | Machine |      |        | Technique |      |        | Interaction |      |        |
|-------------------------------|---------|------|--------|-----------|------|--------|-------------|------|--------|
|                               | $F$     | $df$ | $p$    | $F$       | $df$ | $p$    | $F$         | $df$ | $p$    |
| Geometric distortion (mm)     | 141.446 | 4    | <0.001 | 0.717     | 3    | 0.543  | 8.966       | 12   | <0.001 |
| Spatial resolution (lp/mm)    | 2.595   | 4    | 0.038  | 137.998   | 3    | <0.001 | 2.632       | 12   | 0.003  |
| Uniformity (HU)               | 8.216   | 4    | <0.001 | 19.924    | 3    | <0.001 | 1.660       | 12   | 0.079  |
| Contrast (-)                  | 17.397  | 4    | <0.001 | 27.478    | 3    | <0.001 | 9.027       | 12   | <0.001 |
| Noise (HU)                    | 3.755   | 4    | 0.006  | 1796.776  | 3    | <0.001 | 1.503       | 12   | 0.127  |
| Air HU constancy (HU)         | 4.094   | 4    | 0.003  | 10.937    | 3    | <0.001 | 4.261       | 12   | <0.001 |
| Teflon HU constancy (HU)      | 58.301  | 4    | <0.001 | 216.142   | 3    | <0.001 | 10.762      | 12   | <0.001 |
| Delrin HU constancy (HU)      | 29.477  | 4    | <0.001 | 31.692    | 3    | <0.001 | 5.322       | 12   | <0.001 |
| Acrylic HU constancy (HU)     | 26.707  | 4    | <0.001 | 18.408    | 3    | <0.001 | 9.773       | 12   | <0.001 |
| Polystyrene HU constancy (HU) | 135.380 | 4    | <0.001 | 414.496   | 3    | <0.001 | 71.547      | 12   | <0.001 |
| LDPE HU constancy (HU)        | 126.320 | 4    | <0.001 | 878.523   | 3    | <0.001 | 26.850      | 12   | <0.001 |
| PMP HU constancy (HU)         | 39.225  | 4    | <0.001 | 1010.181  | 3    | <0.001 | 141.307     | 12   | <0.001 |
| 20 % Bone HU constancy (HU)   | 55.079  | 4    | <0.001 | 416.770   | 3    | <0.001 | 9.690       | 12   | <0.001 |
| 50% Bone HU constancy (HU)    | 164.679 | 4    | <0.001 | 876.408   | 3    | <0.001 | 12.014      | 12   | <0.001 |
| Slice thickness (mm)          | 1.011   | 4    | 0.403  | 169.376   | 3    | <0.001 | 1.347       | 12   | 0.196  |

**Table S2:** Detailed statistical results for unpaired Student's T-test used to evaluate difference in mean between the pre-calibration and the post-calibration data for the **head** CBCT technique. Test statistic (*t*), degrees of freedom (*df*) and p-value (*p*) are reported.

| Parameter                     | TB1      |           |          | TB2      |           |          | TB3      |           |          |
|-------------------------------|----------|-----------|----------|----------|-----------|----------|----------|-----------|----------|
|                               | <i>t</i> | <i>df</i> | <i>p</i> | <i>t</i> | <i>df</i> | <i>p</i> | <i>t</i> | <i>df</i> | <i>p</i> |
| Geometric distortion (mm)     | -1.426   | 12        | 0.179    | 0.255    | 16        | 0.802    | -0.909   | 16        | 0.377    |
| Spatial resolution (lp/mm)    | 0.369    | 12        | 0.718    | 0.889    | 16        | 0.387    | 1.012    | 16        | 0.327    |
| Uniformity (HU)               | 3.239    | 12        | 0.007    | -2.895   | 16        | 0.011    | -0.862   | 16        | 0.402    |
| Contrast (-)                  | -3.493   | 12        | 0.004    | 2.000    | 16        | 0.063    | 0.537    | 16        | 0.599    |
| Noise (HU)                    | 1.353    | 12        | 0.201    | -3.038   | 16        | 0.008    | -0.774   | 16        | 0.450    |
| Air HU constancy (HU)         | -6.572   | 12        | <0.001   | 1.428    | 16        | 0.172    | -0.939   | 16        | 0.362    |
| Teflon HU constancy (HU)      | 6.403    | 12        | <0.001   | -1.741   | 16        | 0.101    | 0.091    | 16        | 0.929    |
| Delrin HU constancy (HU)      | 5.857    | 12        | <0.001   | -1.805   | 16        | 0.090    | 0.187    | 16        | 0.854    |
| Acrylic HU constancy (HU)     | 5.608    | 12        | <0.001   | -1.763   | 16        | 0.097    | -0.029   | 16        | 0.977    |
| Polystyrene HU constancy (HU) | 4.464    | 12        | 0.001    | -2.227   | 16        | 0.041    | -0.242   | 16        | 0.812    |
| LDPE HU constancy (HU)        | 4.569    | 12        | 0.001    | -2.023   | 16        | 0.060    | -1.226   | 16        | 0.238    |
| PMP HU constancy (HU)         | 2.155    | 12        | 0.052    | -2.298   | 16        | 0.035    | -0.588   | 16        | 0.565    |
| 20 % Bone HU constancy (HU)   | 5.438    | 12        | <0.001   | -1.825   | 16        | 0.087    | 0.885    | 16        | 0.389    |
| 50% Bone HU constancy (HU)    | 6.286    | 12        | <0.001   | -1.576   | 16        | 0.135    | -1.575   | 16        | 0.135    |
| Slice thickness (mm)          | 2.878    | 12        | 0.014    | 0.492    | 16        | 0.630    | 0.247    | 16        | 0.808    |

**Table S3:** Detailed statistical results for unpaired Student's T-test used to evaluate difference in mean between the pre-calibration and the post-calibration data for the **spotlight** CBCT technique. t is the test statistic and df is the degrees of freedom.

| Parameter                     | TB1    |    |         | TB2    |    |         | TB3    |    |         |
|-------------------------------|--------|----|---------|--------|----|---------|--------|----|---------|
|                               | t      | df | p-value | t      | df | p-value | t      | df | p-value |
| Geometric distortion (mm)     | -0.055 | 11 | 0.957   | 0.504  | 15 | 0.622   | -1.325 | 13 | 0.208   |
| Spatial resolution (lp/mm)    | -0.205 | 11 | 0.841   | 2.152  | 15 | 0.048   | 1.437  | 13 | 0.174   |
| Uniformity (HU)               | -2.348 | 11 | 0.039   | -2.974 | 15 | 0.009   | -3.064 | 13 | 0.009   |
| Contrast (-)                  | -5.442 | 11 | <0.001  | 1.420  | 15 | 0.176   | 0.806  | 13 | 0.435   |
| Noise (HU)                    | 0.015  | 11 | 0.988   | -0.184 | 15 | 0.857   | -1.180 | 13 | 0.259   |
| Air HU constancy (HU)         | 2.452  | 11 | 0.032   | 2.938  | 15 | 0.010   | 0.269  | 13 | 0.792   |
| Teflon HU constancy (HU)      | 2.199  | 11 | 0.050   | -2.671 | 15 | 0.017   | -2.583 | 13 | 0.023   |
| Delrin HU constancy (HU)      | 1.928  | 11 | 0.080   | -2.550 | 15 | 0.022   | -4.126 | 13 | 0.001   |
| Acrylic HU constancy (HU)     | 1.377  | 11 | 0.196   | -2.545 | 15 | 0.022   | -4.304 | 13 | 0.001   |
| Polystyrene HU constancy (HU) | 1.190  | 11 | 0.259   | -1.884 | 15 | 0.079   | -5.191 | 13 | <0.001  |
| LDPE HU constancy (HU)        | 1.398  | 11 | 0.190   | -3.324 | 15 | 0.005   | -4.737 | 13 | <0.001  |
| PMP HU constancy (HU)         | 1.372  | 11 | 0.198   | -1.536 | 15 | 0.145   | -5.663 | 13 | <0.001  |
| 20 % Bone HU constancy (HU)   | 0.591  | 11 | 0.566   | -2.894 | 15 | 0.011   | -2.637 | 13 | 0.021   |
| 50% Bone HU constancy (HU)    | 0.637  | 11 | 0.537   | -3.102 | 15 | 0.007   | -3.545 | 13 | 0.004   |
| Slice thickness (mm)          | 1.734  | 11 | 0.111   | 0.985  | 15 | 0.340   | -1.417 | 13 | 0.180   |

**Table S4:** Detailed statistical results for unpaired Student's T-test used to evaluate difference in mean between the pre-calibration and the post-calibration data for the **thorax** CBCT technique. t is the test statistic and df is the degrees of freedom.

| Parameter                     | TB1    |    |         | TB2    |    |         | TB3    |    |         |
|-------------------------------|--------|----|---------|--------|----|---------|--------|----|---------|
|                               | t      | df | p-value | t      | df | p-value | t      | df | p-value |
| Geometric distortion (mm)     | 1.951  | 10 | 0.080   | -0.303 | 13 | 0.766   | -2.893 | 14 | 0.012   |
| Spatial resolution (lp/mm)    | -2.301 | 10 | 0.044   | 0.168  | 13 | 0.869   | 0.396  | 14 | 0.698   |
| Uniformity (HU)               | -0.944 | 10 | 0.368   | -2.492 | 13 | 0.027   | 0.130  | 14 | 0.899   |
| Contrast (-)                  | -2.019 | 10 | 0.071   | 0.985  | 13 | 0.343   | -1.067 | 14 | 0.304   |
| Noise (HU)                    | 2.412  | 10 | 0.037   | 0.403  | 13 | 0.694   | 0.365  | 14 | 0.721   |
| Air HU constancy (HU)         | -2.920 | 10 | 0.015   | 2.815  | 13 | 0.015   | 0.912  | 14 | 0.377   |
| Teflon HU constancy (HU)      | 4.777  | 10 | 0.001   | -1.371 | 13 | 0.193   | -0.074 | 14 | 0.942   |
| Delrin HU constancy (HU)      | 5.909  | 10 | <0.001  | -1.112 | 13 | 0.286   | 1.131  | 14 | 0.277   |
| Acrylic HU constancy (HU)     | 5.763  | 10 | <0.001  | -1.223 | 13 | 0.243   | 0.630  | 14 | 0.539   |
| Polystyrene HU constancy (HU) | 3.336  | 10 | 0.008   | -0.839 | 13 | 0.416   | 0.280  | 14 | 0.784   |
| LDPE HU constancy (HU)        | 2.921  | 10 | 0.015   | -1.201 | 13 | 0.251   | 1.752  | 14 | 0.102   |
| PMP HU constancy (HU)         | 4.492  | 10 | 0.001   | -0.688 | 13 | 0.503   | 2.445  | 14 | 0.028   |
| 20 % Bone HU constancy (HU)   | 5.087  | 10 | <0.001  | -1.623 | 13 | 0.129   | 1.750  | 14 | 0.102   |
| 50% Bone HU constancy (HU)    | 4.835  | 10 | 0.001   | -1.126 | 13 | 0.281   | -1.007 | 14 | 0.331   |
| Slice thickness (mm)          | -1.030 | 10 | 0.327   | 0.757  | 13 | 0.463   | 1.143  | 14 | 0.272   |

**Table S5:** Detailed statistical results for unpaired Student's T-test used to evaluate difference in mean between the pre-calibration and the post-calibration data for the pelvis CBCT technique. T is the test statistic and df is the degrees of freedom.

| Parameter                     | TB1    |    |         | TB2    |    |         | TB3    |    |         |
|-------------------------------|--------|----|---------|--------|----|---------|--------|----|---------|
|                               | t      | df | p-value | t      | df | p-value | t      | df | p-value |
| Geometric distortion (mm)     | 0.538  | 11 | 0.601   | -0.792 | 14 | 0.442   | -1.930 | 16 | 0.072   |
| Spatial resolution (lp/mm)    | -2.124 | 11 | 0.057   | 1.415  | 14 | 0.179   | 0.775  | 16 | 0.450   |
| Uniformity (HU)               | -2.073 | 11 | 0.062   | -2.717 | 14 | 0.017   | 1.071  | 16 | 0.300   |
| Contrast (-)                  | -1.301 | 11 | 0.220   | 1.235  | 14 | 0.237   | -0.135 | 16 | 0.894   |
| Noise (HU)                    | -1.013 | 11 | 0.333   | 0.341  | 14 | 0.738   | -1.327 | 16 | 0.203   |
| Air HU constancy (HU)         | -1.572 | 11 | 0.144   | 2.217  | 14 | 0.044   | 0.502  | 16 | 0.623   |
| Teflon HU constancy (HU)      | 3.718  | 11 | 0.003   | -1.768 | 14 | 0.099   | -1.442 | 16 | 0.169   |
| Delrin HU constancy (HU)      | 2.396  | 11 | 0.035   | -0.777 | 14 | 0.450   | -0.594 | 16 | 0.561   |
| Acrylic HU constancy (HU)     | 2.114  | 11 | 0.058   | -0.632 | 14 | 0.538   | -0.743 | 16 | 0.468   |
| Polystyrene HU constancy (HU) | 2.089  | 11 | 0.061   | -1.105 | 14 | 0.288   | -0.685 | 16 | 0.503   |
| LDPE HU constancy (HU)        | 1.992  | 11 | 0.072   | -0.853 | 14 | 0.408   | -0.782 | 16 | 0.446   |
| PMP HU constancy (HU)         | 1.707  | 11 | 0.116   | 0.312  | 14 | 0.759   | 0.203  | 16 | 0.842   |
| 20 % Bone HU constancy (HU)   | 3.067  | 11 | 0.011   | -1.354 | 14 | 0.197   | -0.579 | 16 | 0.571   |
| 50% Bone HU constancy (HU)    | 2.648  | 11 | 0.023   | -1.402 | 14 | 0.183   | -2.106 | 16 | 0.051   |
| Slice thickness (mm)          | -0.124 | 11 | 0.904   | -0.310 | 14 | 0.761   | 0.545  | 16 | 0.593   |

**Table S6:** Institutional baselines and tolerances information for each image quality parameter

| <b>Parameter</b>              | <b>Baseline</b> | <b>Spotlight</b> | <b>Pelvis</b> | <b>Head</b> | <b>Thorax</b> | <b>Tolerance</b>        |
|-------------------------------|-----------------|------------------|---------------|-------------|---------------|-------------------------|
| Geometric distortion (mm)     | 0               | 0                | 0             | 0           | 0             | $\pm 1$                 |
| Spatial resolution (lp/mm)    | Mean            | 0.35             | 0.32          | 0.42        | 0.32          | $\pm 2\sigma$           |
| Uniformity (HU)               | 0               | 0                | 0             | 0           | 0             | $\pm 40$                |
| Contrast (-)                  | Mean            | 0.93             | 0.93          | 0.94        | 0.92          | $\pm 2\sigma$           |
| Noise (HU)                    | Mean            | 5.77             | 6.08          | 23.30       | 11.39         | $\pm 2\sigma$           |
| Air HU Constancy (HU)         | Mean            | -999.10          | -999.36       | -997.72     | -999.36       | $\pm 50$                |
| Teflon HU Constancy (HU)      | Mean            | 981.06           | 978.61        | 1047.92     | 1000.70       | $\pm 2\sigma/\pm 50$ HU |
| Delrin HU Constancy (HU)      | Mean            | 368.76           | 367.42        | 384.63      | 378.47        | $\pm 50$                |
| Acrylic HU Constancy (HU)     | Mean            | 129.85           | 126.58        | 133.10      | 132.58        | $\pm 50$                |
| Polystyrene HU Constancy (HU) | Mean            | -29.60           | -32.79        | -35.54      | -29.54        | $\pm 50$                |
| LDPE HU Constancy (HU)        | Mean            | -88.75           | -91.63        | -98.26      | -90.26        | $\pm 50$                |
| PMP HU Constancy (HU)         | Mean            | -181.76          | -185.17       | -192.38     | -184.87       | $\pm 50$                |
| 20% Bone HU Constancy (HU)    | Mean            | 254.15           | 254.76        | 295.07      | 266.11        | $\pm 50$                |
| 50% Bone HU Constancy (HU)    | Mean            | 744.80           | 751.50        | 868.15      | 774.39        | $\pm 2\sigma/\pm 50$ HU |
| Slice thickness (mm)          | Mean            | 1.89             | 2.12          | 1.85        | 2.13          | $\pm 2\sigma$           |
